# Supplementary material for: Aggregation of M3 (E376D) variant of alpha1- antitrypsin
Source: PubMed Central journal article supplement (PMC7237413; doi:10.1038/s41598-020-64860-1), 2020-05-19
Supplement: 41598_2020_64860_MOESM1_ESM.pdf [file 41598_2020_64860_MOESM1_ESM.pdf]

## Supporting Information

### Aggregation of M3 (E376D) variant of alpha1 antitrypsin

Arif Bashir<sup>1</sup>, Younis M. Hazari<sup>1</sup>, Debnath Pal<sup>3</sup>, Dibyajyoti Maity<sup>3</sup>, Samirul Bashir<sup>1</sup>,  
Laishram R. Singh<sup>4</sup>, Naveed N. Shah<sup>2</sup>, and Khalid M. Fazili<sup>1\*</sup>

<sup>1</sup>Department of Biotechnology, University of Kashmir, Srinagar 190006, India,

<sup>2</sup>Department of Chest Medicine, Government Medical College, Srinagar 190006, India,

<sup>3</sup>Computational Data Sciences, Indian Institute of Science, Bengaluru 560012, India,

<sup>4</sup>Dr B.R. Ambedkar Center for Biomedical Research, University of Delhi, Delhi 110007, India

Running title: Aggregation of M3- $\alpha$ 1AT

\*To whom correspondence should be addressed

Khalid Majid Fazili

Professor

Department of Biotechnology

University of Kashmir-190006

[fazili@kashmiruniversity.ac.in](mailto:fazili@kashmiruniversity.ac.in)

[bashir.aarif@gmail.com](mailto:bashir.aarif@gmail.com)

Tel. (+91) 9419003881

Fax. (+91) 1942403610

**Keywords:** COPD: chronic obstructive pulmonary disease,  $\alpha$ 1AT: alpha1 antitrypsin, CD (circular dichroism) spectroscopy, molecular dynamics (MD) simulations, DLS: dynamic light scattering

## Supporting Information

**Figure S1. Native-PAGE of all  $\alpha$ 1AT proteins showing aggregation behaviour over 7 days of time.**

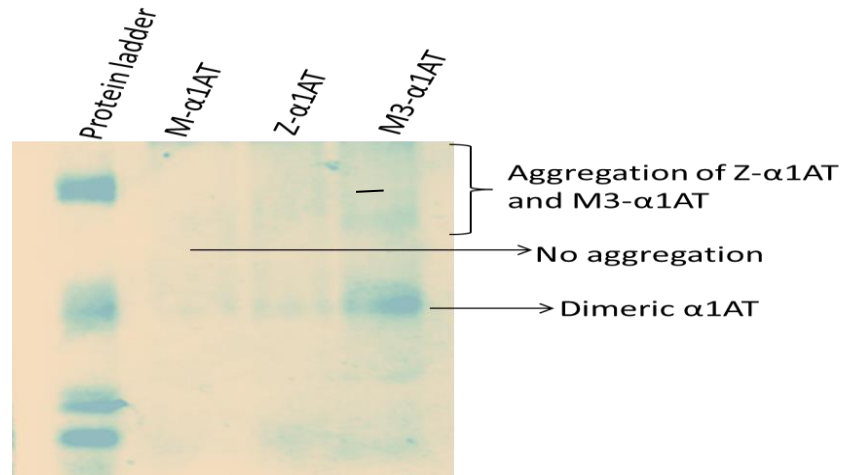

**Figure S1**

**Figure S2. All  $\alpha$ 1AT proteins behave differently upon trypsin treatment.**

**(A-C).** 12% SDS-PAGE of 0.54 $\mu$ M  $\alpha$ 1ATs (M- $\alpha$ 1AT, Z- $\alpha$ 1AT and M3- $\alpha$ 1AT) without and with 0.06  $\mu$ M trypsin incubated at 37°C for two minutes. Lane 1 represents multicolor protein ladder. Lane 2 represents a mixture with only 0.06  $\mu$ M trypsin. Lane 3–5 represents undigested M- $\alpha$ 1AT, Z- $\alpha$ 1AT, and M3- $\alpha$ 1AT. Lane 6–8 represents 0.06  $\mu$ M trypsin treated M- $\alpha$ 1AT, Z- $\alpha$ 1AT, and M3- $\alpha$ 1AT.

**(D).** Western blot of 0.54 $\mu$ M  $\alpha$ 1ATs (M- $\alpha$ 1AT, Z- $\alpha$ 1AT and M3- $\alpha$ 1AT) without and with 0.06  $\mu$ M trypsin incubated at 37°C for two minutes. Lane 1 represents multicolor protein ladder.

Lane 2 represents a mixture with only 0.06  $\mu$ M trypsin. Lane 3-5 represents undigested M- $\alpha$ 1AT, Z- $\alpha$ 1AT, and M3- $\alpha$ 1AT. Lane 6-8 represents 0.06  $\mu$ M trypsin treated M- $\alpha$ 1AT, Z- $\alpha$ 1AT, and M3- $\alpha$ 1AT.

**(E).** The inhibitory properties of  $\alpha$ 1AT proteins tested against trypsin on 12% SDS-PAGE. Lane 1 represents multicolor protein ladder. Lane 2 is loaded with 0.54 $\mu$ M M- $\alpha$ 1AT + 0.010  $\mu$ M trypsin, Lane 3 with 0.54 $\mu$ M M- $\alpha$ 1AT + 0.015  $\mu$ M trypsin, Lane 4 with 0.54 $\mu$ M Z- $\alpha$ 1AT + 0.010  $\mu$ M trypsin, Lane 5 with 0.54 $\mu$ M Z- $\alpha$ 1AT + 0.015  $\mu$ M trypsin, Lane 6 with 0.54 $\mu$ M M3- $\alpha$ 1AT + 0.010  $\mu$ M trypsin, and lane 7 with 0.54 $\mu$ M M3- $\alpha$ 1AT + 0.015  $\mu$ M trypsin.

## Supporting Information

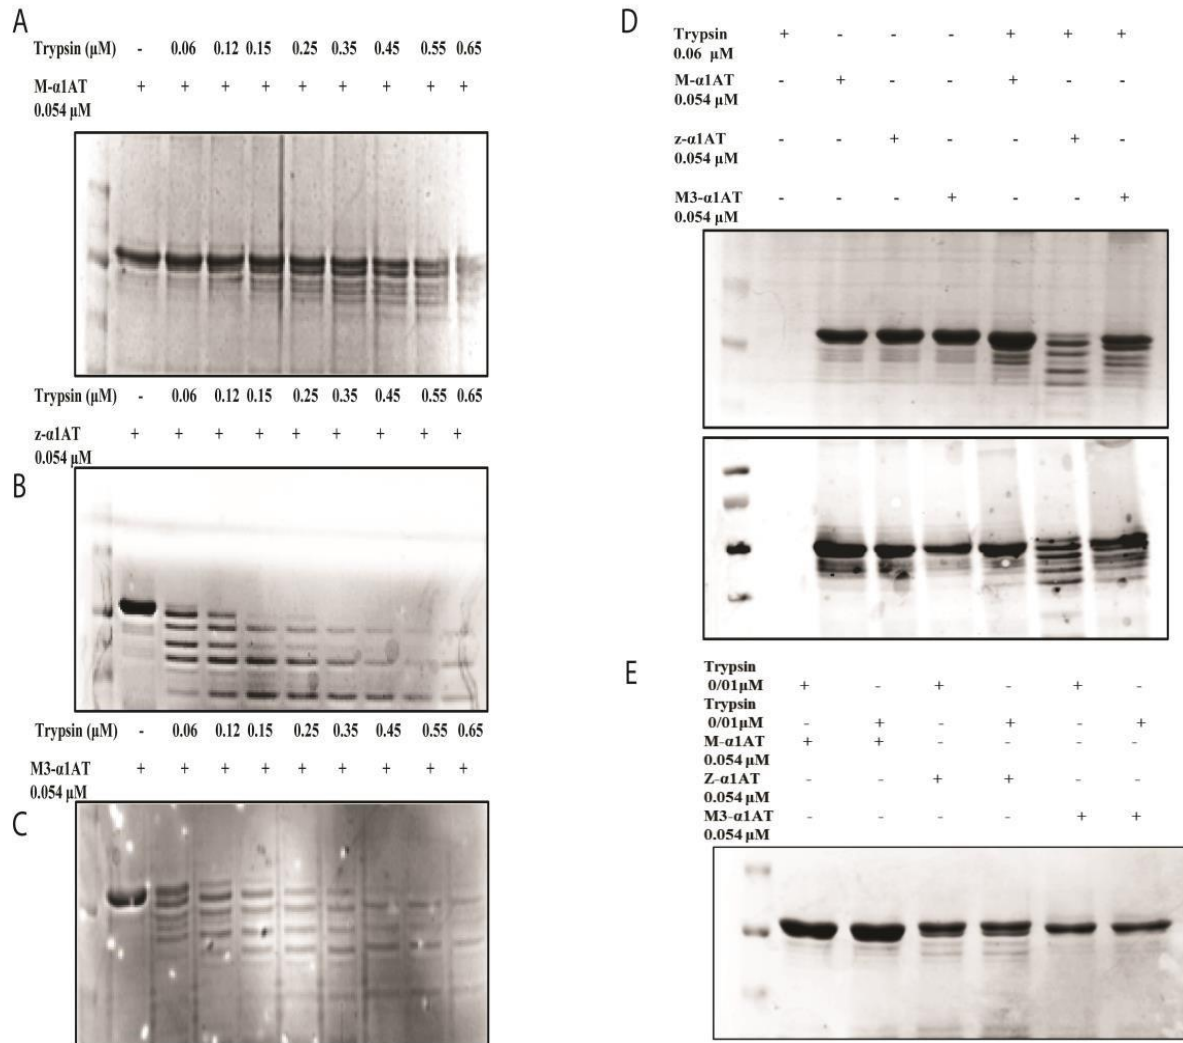

**Figure S2**

### Supporting Information

**Table S1.** Association of 376 A/C single nucleotide polymorphism with various demographic variables, environmental factors, clinicopathological parameters, and family history in COPD cases.

| Characteristics               | N=70        | AA<br>14 (20.00%) | AC<br>41 (58.57%) | CC<br>15 (21.43%) | Odds ratio 95%CI, P value         | $\chi^2$ ; P value<br>(Overall)* |
|-------------------------------|-------------|-------------------|-------------------|-------------------|-----------------------------------|----------------------------------|
| <b>Gender</b>                 |             |                   |                   |                   |                                   |                                  |
| Male                          | 49 (70.00%) | 10 (71.42%)       | 27 (65.85%)       | 12 (80.00%)       | AC 1.29 (0.34 – 4.88); p = 0.7551 | 1.0635;<br>0.5875                |
| Female                        | 21 (30.00%) | 04 (28.57%)       | 14 (34.14%)       | 03 (20.00%)       | CC 0.62 (0.11 – 3.47); p = 0.6816 |                                  |
| <b>Dwelling</b>               |             |                   |                   |                   |                                   |                                  |
| Rural                         | 45 (64.28%) | 10 (71.42%)       | 22 (53.65%)       | 13 (86.66%)       | AC 2.15 (0.58 – 8.01); p =0.3497  | 5.660;<br>0.0607                 |
| Urban                         | 25 (35.71%) | 04 (28.57%)       | 19 (46.34%)       | 02 (13.33%)       | CC 0.38 (0.05 – 2.53); p = 0.3898 |                                  |
| <b>Smoking status</b>         |             |                   |                   |                   |                                   |                                  |
| Ever                          | 42 (60.00%) | 09 (64.28%)       | 22 (53.65%)       | 11 (73.33%)       | AC 1.55 (0.44 – 5.44); p =0.5470  | 1.905;<br>0.3857                 |
| Never                         | 28 (40.00%) | 05 (35.71%)       | 19 (46.34%)       | 04 (26.66%)       | CC 0.65(0.13 – 3.19); p = 0.6999  |                                  |
| <b>Hemoptysis</b>             |             |                   |                   |                   |                                   |                                  |
| Yes                           | 25 (35.71%) | 04 (28.57%)       | 18 (43.90%)       | 03 (20.00%)       | AC 0.51(0.13 – 1.90); p = 0.3614  | 3.121;<br>0.2099                 |
| No                            | 45 (64.28%) | 10 (71.42%)       | 23 (56.09%)       | 12 (80.00%)       | CC 1.60(0.28 – 8.90); p = 0.6816  |                                  |
| <b>PFT** =70%<br/>&lt;70%</b> |             |                   |                   |                   |                                   |                                  |
| =70%                          | 52 (74.28%) | 12 (85.71%)       | 28 (68.29%)       | 12 (80.00%)       | AC 2.79(0.54 – 14.30); p = 0.3040 | 1.984;<br>0.3707                 |
| <70%                          | 18 (25.71%) | 02 (14.28%)       | 13 (31.70%)       | 03 (20.00%)       | CC 1.50 (0.21 – 10.65); p = 1.000 |                                  |
| <b>Obstructive jaundice</b>   |             |                   |                   |                   |                                   |                                  |
| Yes                           | 29 (41.42%) | 03 (21.42%)       | 19 (46.34%)       | 07 (46.66%)       | AC 0.29(0.07 – 1.30); p = 0.1245  | 2.885;<br>0.2363                 |
| No                            | 41 (58.57%) | 11 (78.57%)       | 22 (53.65%)       | 08 (53.33%)       | CC 0.31(0.06 – 1.59); p = 0.2450  |                                  |
| <b>Family history</b>         |             |                   |                   |                   |                                   |                                  |
| Yes                           | 44 (62.85%) | 09 (64.28%)       | 28 (68.29%)       | 07 (46.66%)       | AC 0.83 (0.23– 2.99); p = 1.0000  | 2.215;<br>0.3303                 |
| No                            | 26 (37.14%) | 05 (35.71%)       | 13 (31.70%)       | 08 (53.33%)       | CC 2.05 (0.46– 9.14); p = 0.4621  |                                  |

\* The values in bold indicate significant results. CI: confidence interval.

\*\* PFT (pulmonary function test) done before the salbutamol nebulization to COPD patients.

## Supporting Information

**Table S2.** Secondary structure distribution from DSSP calculation on the trajectory between 700 ns and 1000 ns.

|                                 | <b>M-<math>\alpha</math>1AT</b> | <b>Z-<math>\alpha</math>1AT</b> | <b>M3-<math>\alpha</math>1AT</b> |
|---------------------------------|---------------------------------|---------------------------------|----------------------------------|
| <b>Structured</b>               | 0.66                            | 0.63                            | 0.63                             |
| <b>Helix</b>                    | 0.30                            | 0.27                            | 0.29                             |
| <b><math>\beta</math>-Sheet</b> | 0.28                            | 0.28                            | 0.28                             |
| <b>Turn + Bend</b>              | 0.2                             | 0.2                             | 0.19                             |
| <b>Coil</b>                     | 0.22                            | 0.25                            | 0.24                             |

**Table S3.** Residues with significantly different mean electrostatic potential in the 700–1000 ns molecular dynamics trajectory.

| <b>Residue position</b> | <b>Percentage overlap in mean electrostatic potential distribution</b> |                                                          |                                                           |
|-------------------------|------------------------------------------------------------------------|----------------------------------------------------------|-----------------------------------------------------------|
|                         | <b>M-<math>\alpha</math>1AT-Z-<math>\alpha</math>1AT</b>               | <b>M-<math>\alpha</math>1AT-M3<math>\alpha</math>1AT</b> | <b>Z<math>\alpha</math>1AT- M3-<math>\alpha</math>1AT</b> |
| 60-Ala*                 | 91.7                                                                   | 0.0**                                                    | 0.0**                                                     |
| 351-Met*                | 20.7                                                                   | 2.0                                                      | 81.6                                                      |
| 113-Thr                 | 76.8                                                                   | 5.3                                                      | 0.0**                                                     |
| 188-Ile                 | 88.0                                                                   | 17.1                                                     | 4.1                                                       |
| 335-Lys                 | 92.8                                                                   | 0.0**                                                    | 19.8                                                      |
| 223-Arg                 | 0.0**                                                                  | 0.0**                                                    | 99.9                                                      |
| 227-Phe                 | 3.5                                                                    | 97.5                                                     | 6.1                                                       |
| 228-Asn                 | 0.0                                                                    | 67.2                                                     | 32.5                                                      |
| 290-Lys                 | 28.3                                                                   | 48.3                                                     | 0.0**                                                     |
| 341-Asp                 | 0.0**                                                                  | 76.1                                                     | 0.0**                                                     |
| 342-Glu                 | 0.0**                                                                  | 75.3                                                     | 0.0**                                                     |

\* Residues shown in groups are contiguous to each other except for 60-Ala and 351-Met.

\*\*Residues with zero overlap of mean electrostatic potential mean significant perturbation.
